# Supplementary material for: Structural Characteristics of the 5′-Terminal Region of Mouse p53 mRNA and Identification of Proteins That Bind to This mRNA Region
Source: MDPI journal article supplement (doi:10.3390/ijms23179709), 2022-08-26
Supplement: s1 [file s1]

## Supplementary materials

### Structural characteristics of the 5'-terminal region of mouse p53 mRNA and identification of proteins that bind to this mRNA region

Joanna Szpotkowska<sup>1,2,†</sup>, Kamil Szpotkowski<sup>1,†</sup>, and Jerzy Ciesiołka<sup>1,\*</sup>

<sup>1</sup>Institute of Bioorganic Chemistry, Polish Academy of Sciences, 61-704 Poznan, Poland

<sup>2</sup>Department of Gene Expression, Faculty of Biology, Institute of Molecular Biology and Biotechnology, Adam Mickiewicz University Poznan, 61-614, Poznan, Poland

\* Correspondence: jerzy.ciesiolka@ibch.poznan.pl

†These authors contributed equally to this work.

**Table S1.** List of primers used to synthesize RNAs: -30/-10, -38/-2, 47/81, and 47/140. The T7 transcription promoter sequence is marked in italics.

| Name     | Sequence (5'-3')                                      |
|----------|-------------------------------------------------------|
| -30/-10F | <i>TAATACGACTCACTATAGGC</i> ACGCTTCTCC                |
| -30/-10R | CAGTCTTCGGAGAAGCGTGCCTATAGTGAGTC                      |
| -38/-2F  | <i>TAATACGACTCACTATAGGC</i> AGGGTGTACGCTTCTCCGAAG     |
| -38/-2R  | GCAGTCATCCAGTCTTCGGAGAAGCGTGACACCCTGC                 |
| 47/140F  | <i>TAATACGACTCACTATAGGT</i> GAGCCAGGAGACATTTTCAGGCTTA |
| 47/140R  | ACATCCTGGGGCAGCAACAGAT                                |
| 47/81F   | <i>TAATACGACTCACTATAGAGG</i> AGACATTTTCAGGCTT         |
| 47/81R   | AGGAAGTAGTTTCCATAAGCCTGAAAATGTCTCCT                   |

**Table S2.** Structural parameters derived from SAXS data for RNA-106/-78 and RNA-30/-10 in three Mg<sup>2+</sup> concentrations.

| RNA      | Mg <sup>2+</sup><br>concentration<br>[nM] | R <sub>g</sub> (from p(r))<br>(nm) | R <sub>g</sub> (from<br>Guinier) (nm) | D <sub>max</sub> (nm) |
|----------|-------------------------------------------|------------------------------------|---------------------------------------|-----------------------|
| -106/-78 | 0                                         | 1.72±0.06                          | 1.84±0.28                             | 5.17                  |
|          | 2.5                                       | 2.08±0.06                          | 2.04±0.28                             | 7.10                  |
|          | 5                                         | 1.97±0.06                          | 1.97±0.23                             | 6.45                  |
| -30/-10  | 0                                         | 1.32±0.03                          | 1.36±0.12                             | 4.31                  |
|          | 2.5                                       | 1.49±0.03                          | 1.52±0.11                             | 4.64                  |
|          | 5                                         | 1.50±0.05                          | 1.46±0.03                             | 5.07                  |

Abbreviations: R<sub>g</sub> – Radius of gyration, D<sub>max</sub> – maximum dimension

**Table S3.** List of candidate proteins identified by RNA-assisted chromatography combined with MS analysis.

| No. | ID     | Name                                                                       | sample | control |
|-----|--------|----------------------------------------------------------------------------|--------|---------|
| 1   | P09405 | Nucleolin                                                                  | 40     | -       |
| 2   | P29341 | Polyadenylate-binding protein 1                                            | 24     | 7       |
| 3   | P62827 | GTP-binding nuclear protein Ran                                            | 22     | -       |
| 4   | P49312 | Heterogeneous nuclear ribonucleoprotein A1                                 | 20     | -       |
| 5   | O88569 | Heterogeneous nuclear ribonucleoproteins A2/B1                             | 18     | -       |
| 6   | P50580 | Proliferation-associated protein 2G4                                       | 17     | -       |
| 7   | P47962 | 60S ribosomal protein L5                                                   | 16     | -       |
| 8   | Q9CY58 | Plasminogen activator inhibitor 1 RNA-binding protein                      | 16     | 1       |
| 9   | Q99020 | Heterogeneous nuclear ribonucleoprotein A/B                                | 14     | -       |
| 10  | Q60668 | Heterogeneous nuclear ribonucleoprotein D0                                 | 13     | -       |
| 11  | P97855 | Ras GTPase-activating protein-binding protein 1                            | 12     | -       |
| 12  | Q9JKB3 | Y-box-binding protein 3                                                    | 12     | -       |
| 13  | Q64152 | Transcription factor BTF3                                                  | 10     | -       |
| 14  | P63158 | High mobility group protein B1                                             | 9      | 1       |
| 15  | Q80X50 | Ubiquitin-associated protein 2-like                                        | 9      | 2       |
| 16  | P28352 | DNA-(apurinic or apyrimidinic site) endonuclease                           | 9      | -       |
| 17  | P70670 | Nascent polypeptide-associated complex subunit alpha, muscle-specific form | 8      | -       |
| 18  | Q60817 | Nascent polypeptide-associated complex subunit alpha                       | 8      | -       |
| 19  | Q8BG05 | Heterogeneous nuclear ribonucleoprotein A3                                 | 8      | -       |
| 20  | Q91VU7 | Pseudouridylate synthase 7 homolog                                         | 7      | -       |
| 21  | Q61820 | GTP-binding nuclear protein Ran, testis-specific isoform                   | 7      | -       |
| 22  | Q91WJ8 | Far upstream element-binding protein 1                                     | 7      | -       |
| 23  | P62960 | Y-box-binding protein 1                                                    | 7      | -       |
| 24  | P17225 | Polypyrimidine tract-binding protein 1                                     | 7      | -       |
| 25  | Q8CHP5 | Partner of Y14 and mago                                                    | 7      | -       |
| 26  | Q8VDJ3 | Vigilin                                                                    | 7      | -       |
| 27  | O89086 | RNA-binding protein 3                                                      | 6      | -       |
| 28  | Q5SF07 | Insulin-like growth factor 2 mRNA-binding protein 2                        | 6      | -       |
| 29  | Q91W59 | RNA-binding motif, single-stranded-interacting protein 1                   | 6      | -       |
| 30  | P84104 | Serine/arginine-rich splicing factor 3                                     | 6      | -       |
| 31  | P56959 | RNA-binding protein FUS                                                    | 5      | -       |
| 32  | O08663 | Methionine aminopeptidase 2                                                | 5      | -       |
| 33  | Q61545 | RNA-binding protein EWS                                                    | 5      | -       |
| 34  | Q6PDM2 | Serine/arginine-rich splicing factor 1                                     | 5      | -       |
| 35  | P51859 | Hepatoma-derived growth factor                                             | 5      | -       |
| 36  | Q8VC70 | RNA-binding motif, single-stranded-interacting protein 2                   | 5      | -       |
| 37  | Q9Z2X1 | Heterogeneous nuclear ribonucleoprotein F                                  | 5      | -       |
| 38  | Q99JF8 | PC4 and SFRS1-interacting protein                                          | 5      | -       |
| 39  | P30681 | High mobility group protein B2                                             | 4      | -       |
| 40  | Q3U0V1 | Far upstream element-binding protein 2                                     | 4      | -       |
| 41  | Q61990 | Poly(rC)-binding protein 2                                                 | 4      | -       |
| 42  | P61979 | Heterogeneous nuclear ribonucleoprotein K                                  | 4      | -       |
| 43  | P20152 | Vimentin                                                                   | 4      | -       |

|    |        |                                                          |   |   |
|----|--------|----------------------------------------------------------|---|---|
| 44 | Q6P9R2 | Serine/threonine-protein kinase OSR1                     | 4 | - |
| 45 | Q9Z1W9 | STE20/SPS1-related proline-alanine-rich protein kinase   | 4 | - |
| 46 | Q9Z130 | Heterogeneous nuclear ribonucleoprotein D-like           | 4 | - |
| 47 | Q9CPN8 | Insulin-like growth factor 2 mRNA-binding protein 3      | 3 | - |
| 48 | P70372 | ELAV-like protein 1                                      | 3 | - |
| 49 | Q9D0E1 | Heterogeneous nuclear ribonucleoprotein M                | 3 | - |
| 50 | Q60899 | ELAV-like protein 2                                      | 3 | - |
| 51 | O35737 | Heterogeneous nuclear ribonucleoprotein H                | 3 | - |
| 52 | Q99LF4 | RNA-splicing ligase RtcB homolog                         | 3 | - |
| 53 | Q61937 | Nucleophosmin                                            | 3 | - |
| 54 | P17095 | High mobility group protein HMG-I/HMG-Y                  | 3 | - |
| 55 | Q9JMG7 | Hepatoma-derived growth factor-related protein 3         | 3 | - |
| 56 | P97379 | Ras GTPase-activating protein-binding protein 2          | 3 | - |
| 57 | Q08093 | Calponin-2                                               | 3 | - |
| 58 | P16858 | Glyceraldehyde-3-phosphate dehydrogenase                 | 3 | - |
| 59 | P63013 | Paired mesoderm homeobox protein 1                       | 2 | - |
| 60 | Q9Z2C8 | Y-box-binding protein 2                                  | 2 | - |
| 61 | P57722 | Poly(rC)-binding protein 3                               | 2 | - |
| 62 | O54879 | High mobility group protein B3                           | 2 | - |
| 63 | P84078 | ADP-ribosylation factor 1                                | 2 | - |
| 64 | P61205 | ADP-ribosylation factor 3                                | 2 | - |
| 65 | Q60865 | Caprin-1                                                 | 2 | - |
| 66 | P24369 | Peptidyl-prolyl cis-trans isomerase B                    | 2 | - |
| 67 | Q8QZY9 | Splicing factor 3B subunit 4                             | 2 | - |
| 68 | O70310 | Glycylpeptide N-tetradecanoyltransferase 1               | 2 | - |
| 69 | P07356 | Annexin A2                                               | 2 | - |
| 70 | O35295 | Transcriptional activator protein Pur-beta               | 2 | - |
| 71 | P63101 | 14-3-3 protein zeta/delta                                | 2 | - |
| 72 | P60335 | Poly(rC)-binding protein 1                               | 2 | - |
| 73 | Q5SW19 | Clustered mitochondria protein homolog                   | 2 | - |
| 74 | Q501J6 | Probable ATP-dependent RNA helicase DDX17                | 2 | - |
| 75 | Q8BHD7 | Polypyrimidine tract-binding protein 3                   | 2 | - |
| 76 | Q8BWL5 | RNA-binding motif, single-stranded-interacting protein 3 | 2 | - |
| 77 | Q9JII5 | DAZ-associated protein 1                                 | 2 | - |
| 78 | Q9CQH7 | Transcription factor BTF3 homolog 4                      | 2 | - |
| 79 | Q923D5 | WW domain-binding protein 11                             | 2 | - |
| 80 | P07901 | Heat shock protein HSP 90-alpha                          | 2 | - |
| 81 | P11499 | Heat shock protein HSP 90-beta                           | 2 | - |
| 82 | P0C5E4 | Phosphatidylinositol phosphatase PTPRQ                   | 2 | - |
| 83 | Q0VFX2 | Cilia- and flagella-associated protein 157               | 2 | - |
| 84 | Q3U3T8 | WD repeat-containing protein 62                          | 2 | - |

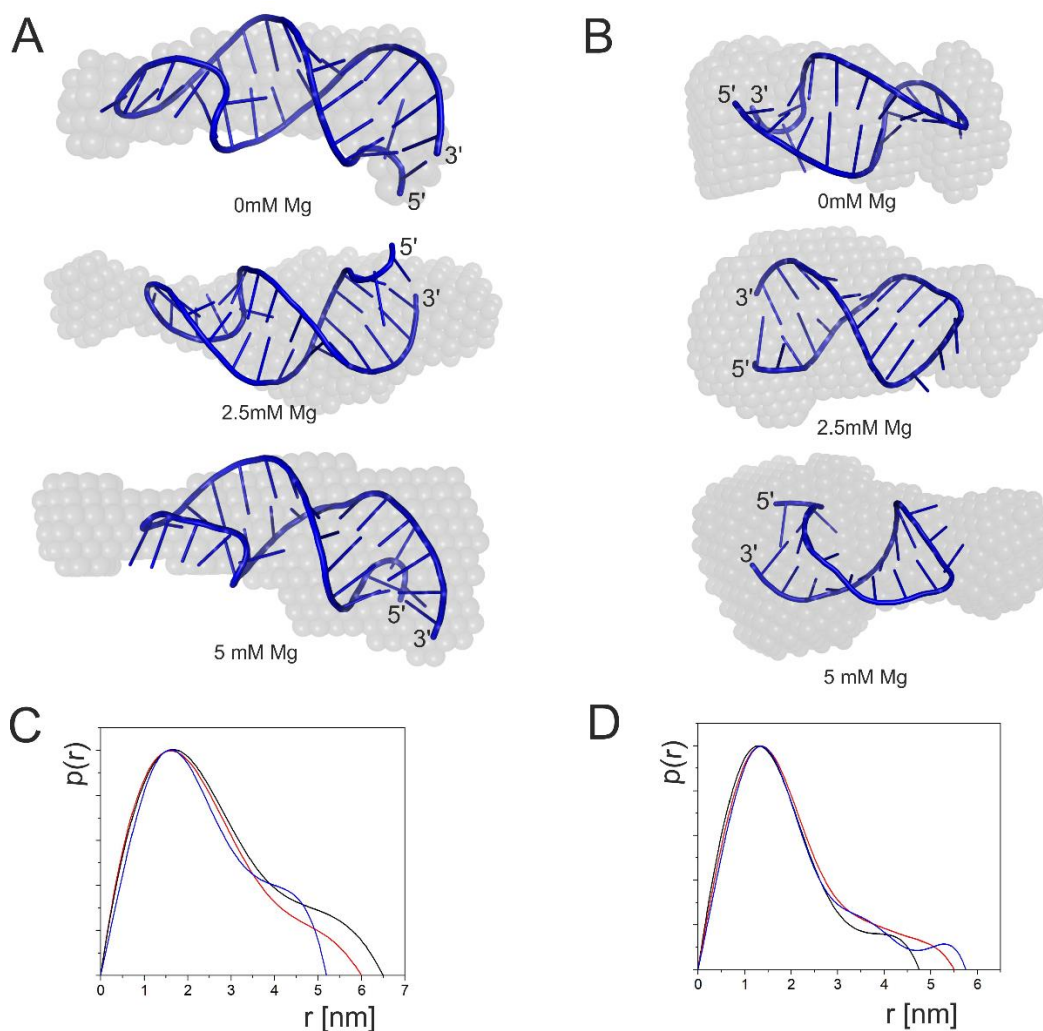

**Figure S1. The impact of magnesium ions on mRNA fragments structure.** Evolution of *ab initio* structure of RNA-106/-78 (A) and RNA-30/-10 (B) upon increasing concentration of magnesium ions. Changes of the shape of the pair distance distribution function corresponding to the *ab initio* shape of RNA-106/-78 (C) and RNA-30/-10 (D): black – 0 mM  $Mg^{2+}$ , red – 2,5 mM  $Mg^{2+}$ , blue – 5 mM  $Mg^{2+}$ .

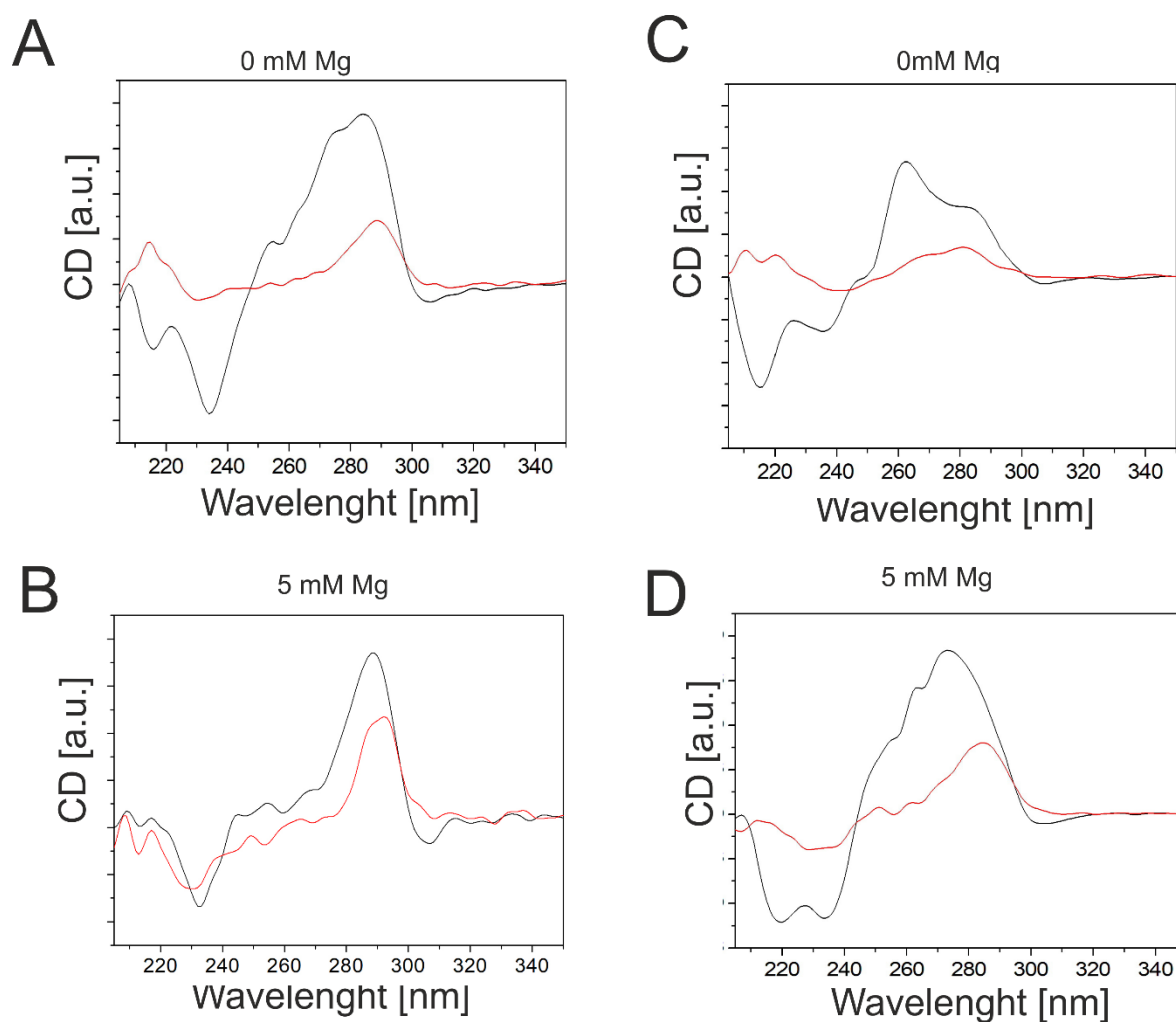

**Figure S2.** Circular dichroism spectra of RNA -30/-10 (A and B) RNA -106/-78 (C and D) in a buffer with and without  $\text{Mg}^{+2}$  ions at two different temperatures: 25°C and 85°C (black and red curves, respectively). All spectra have a broad positive maximum covering the region from 260 to 300 nm and negative peaks at 210 and 240 nm.

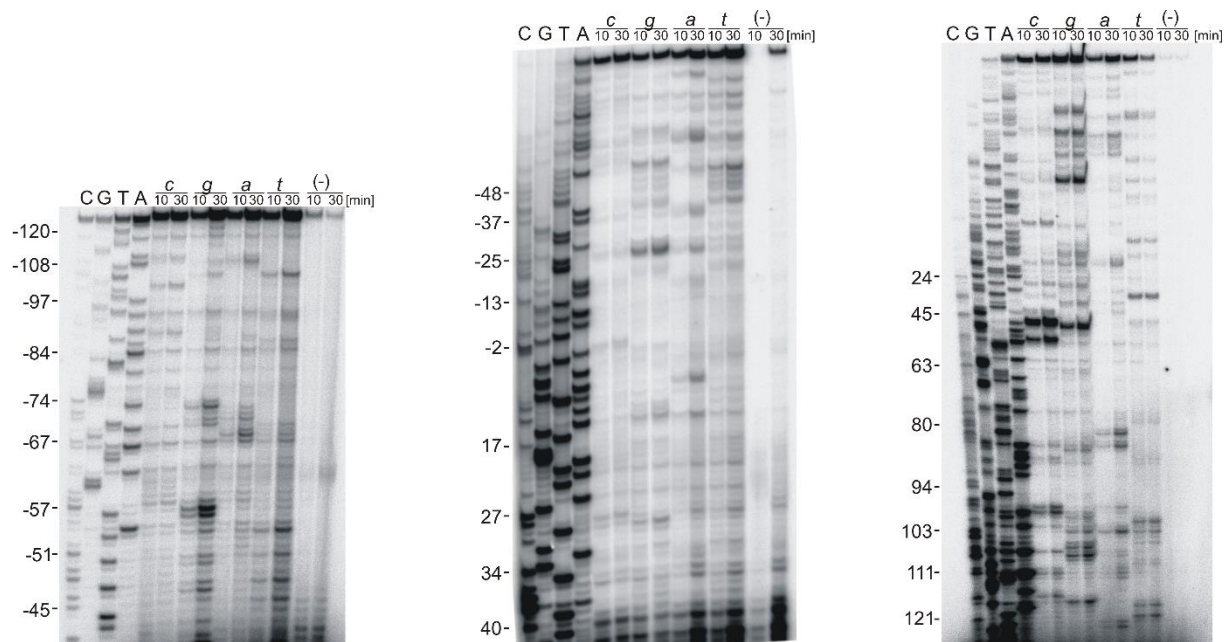

**Figure S3. RNA accessibility mapping to oligonucleotide hybridization.** Autoradiograms show RNase H cleavage sites identified by reverse transcription with 5' end-[<sup>32</sup>P]-labelled DNA primers. Selected cytosine and adenosine residues are presented on the left side of each autoradiogram. Sequencing lines are marked as C, G, T, A. *c, g, t, a* – semi-random libraries with one nucleotide residue fixed in the third position. Incubation time for each reaction is also shown.

A

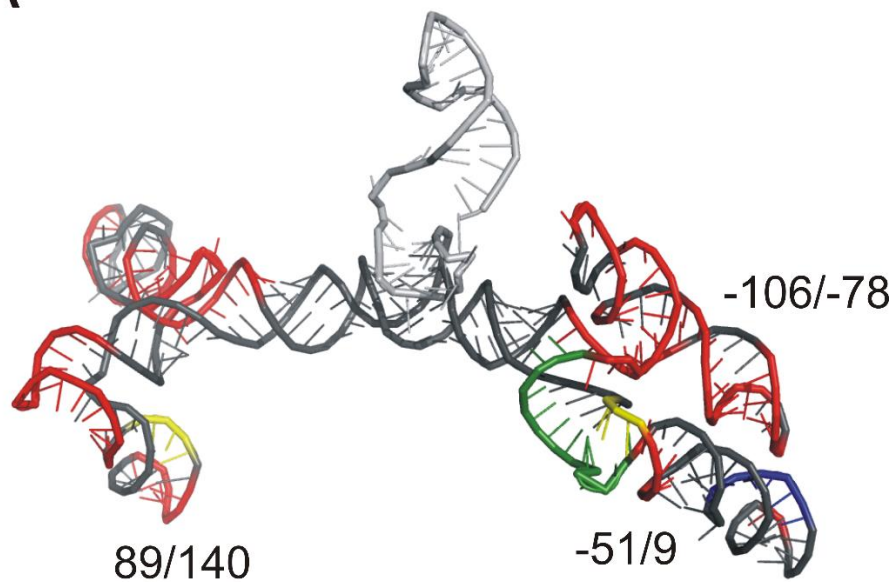

B

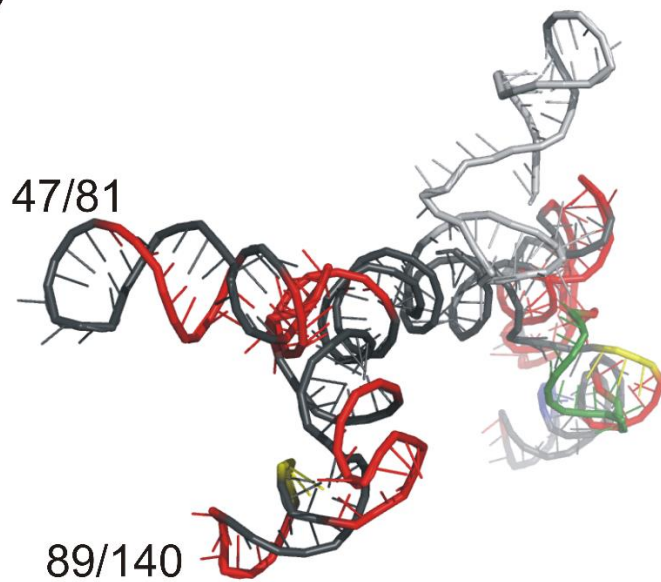

**Figure S4. Mapping of RNA accessibility to hybridization of complementary oligonucleotides.** Short semi-random DNA libraries and RNase H cleavage approach were used to map sites accessible to hybridization in the 5'-terminal region of mouse p53 mRNA. Only nucleotides where at least three oligomers potentially bind to RNA are shown in the figure in red color. AUG1 and AUG2 codons are marked in yellow, binding sites for hnRNP K and PCBP2 proteins are indicated in blue and green, respectively. Accessibility of mRNA regions C(-106):G(-78) and C(-51):G9 (**A**) and G47:U81 and G89:U140 (**B**) is visualized.

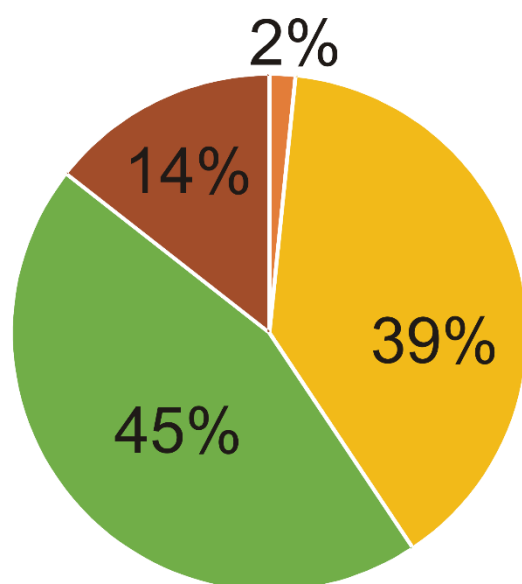

**Figure S5. Pie chart representing distribution of proteins identified by RNA-assisted affinity chromatography combined with mass spectrometry for NIH3T3 cells.** Candidates – 45% (green), translation machinery – 39% (yellow), histones – 14% (brown), known interactions – 2% (orange).





**Figure S6. Alignment of the 5'-terminal regions of p53 mRNA sequences derived from eleven different species (modified from (Szpotkowska et al. 2019; Figure 2)) with binding sites of hnRNP K and PCBP2 proteins.** Binding sites of hnRNP K (blue lines) and PCBP2 (green lines) are marked along the sequences for mouse and human p53 mRNA (denoted with 'm' and 'h' letters, respectively). Capital letters symbolize mRNA sequence (derived from GeneBank) and lowercase letters indicate *p53* gene sequence (obtained from Ensembl) of the region homologous to the longest identified mouse transcript. Translation initiation codons AUG1 and AUG2 are depicted. Alignment is colored according to the percentage of sequence conservation (red, 100%; green, 80% – 99%; blue, 60% – 79%).
